# Supplementary material for: Sex Differences in the In Vivo Exposure Process of Multiple Components of Gelsemium elegans in Rats
Source: MDPI journal article supplement (doi:10.3390/metabo13010033), 2022-12-24

**Figure S1.** Accurate extracted ion chromatograms (EICs) of humantenine-type alkaloids (a) and koumine (b).

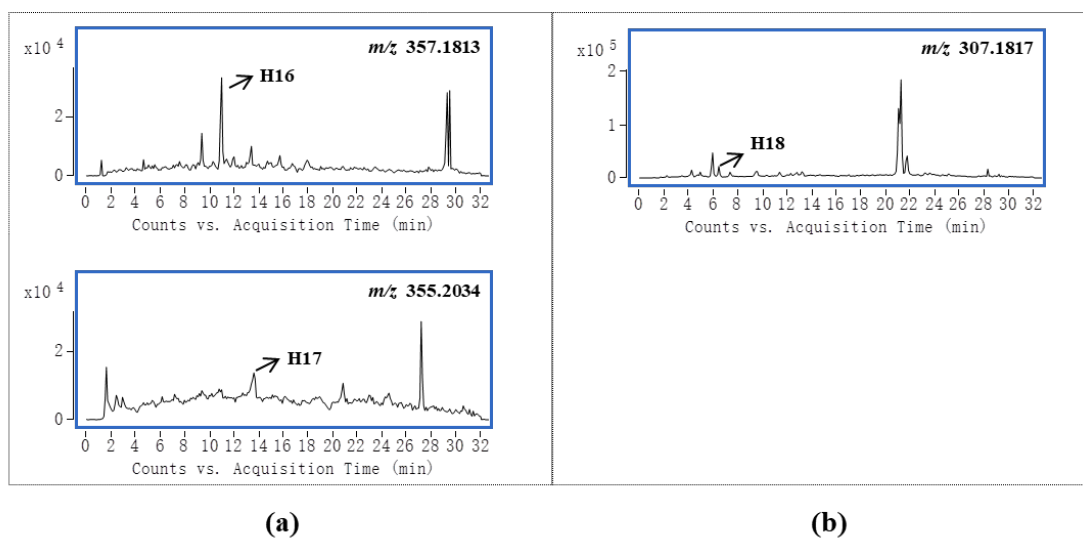

**Figure S2. :** Accurate extracted ion chromatograms (EICs) of nonalkaloids.

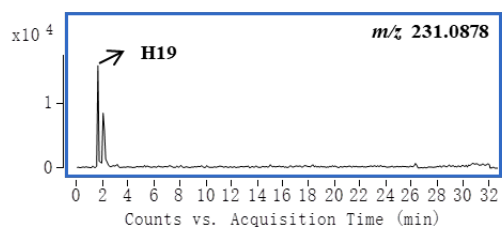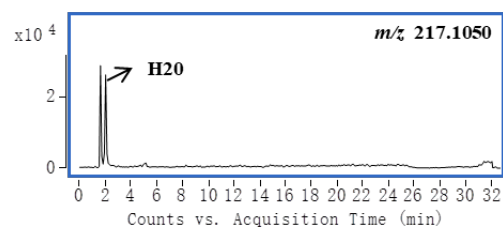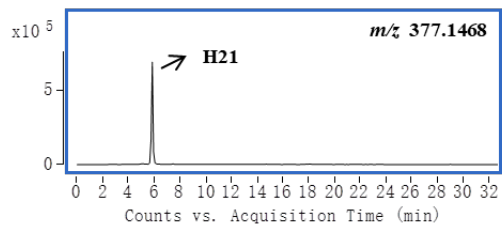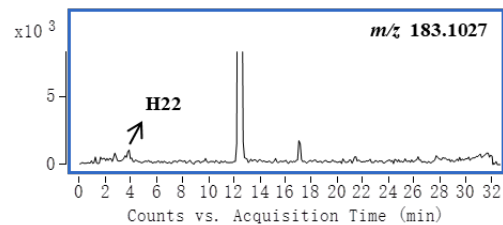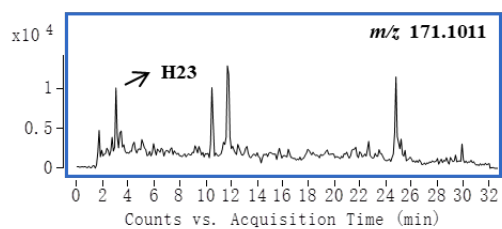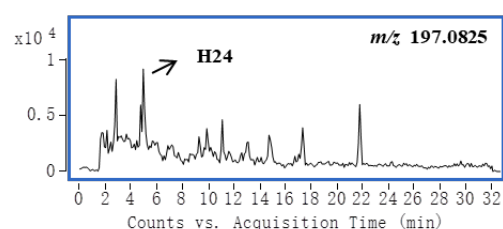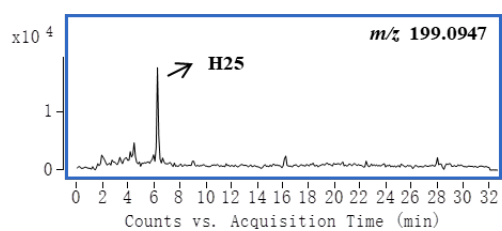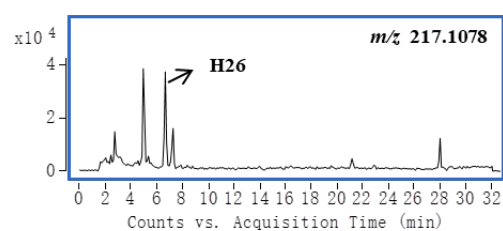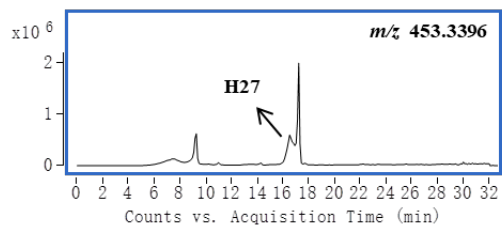

Supplement: s1 [file s1]
